# Supplementary material
Source: Research Square preprint supplement (doi:10.21203/rs.3.rs-9418860/v1)

**Graphical abstract**

**
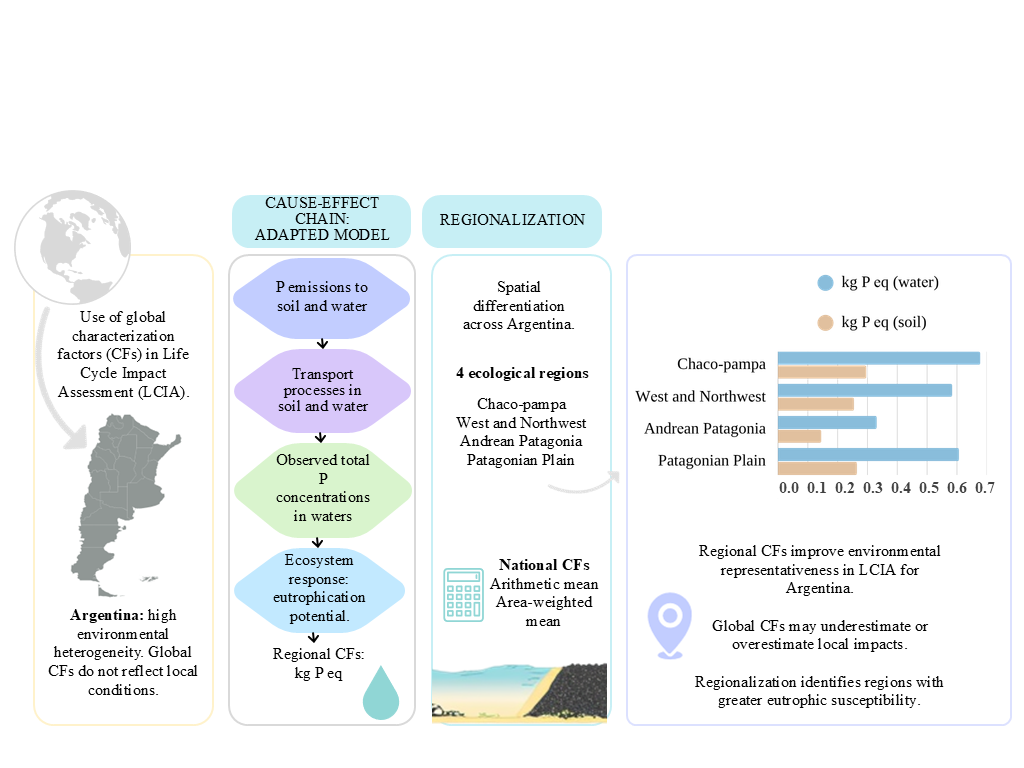
**

Supplement: Supplementary file 1 [file 2b4c1d32d5024345619733d3.docx]
